1 **Murine monoclonal antibodies against RBD of SARS-CoV-2 neutralize authentic wild type**  
2 **SARS-CoV-2 as well as B.1.1.7 and B.1.351 viruses and protect *in vivo* in a mouse model in**  
3 **a neutralization dependent manner**

4 Fatima Amanat<sup>1,2</sup>, Shirin Strohmeier<sup>1</sup>, Wen-Hsin Lee<sup>3</sup>, Sandhya Bangaru<sup>3</sup>, Andrew B. Ward<sup>3</sup>,  
5 Lynda Coughlan<sup>4</sup>, and Florian Krammer<sup>1</sup>

6 <sup>1</sup>*Graduate School of Biomedical Sciences, Icahn School of Medicine at Mount Sinai, New York,*  
7 *NY, USA*

8 <sup>2</sup>*Department of Microbiology, Icahn School of Medicine at Mount Sinai, New York, NY, USA*

9 <sup>3</sup>*Department of Integrative Structural and Computational Biology, The Scripps Research*  
10 *Institute, La Jolla, CA, USA*

11 <sup>4</sup>*University of Maryland School of Medicine, Maryland, USA*

12 *\*To whom correspondence should be addressed: [florian.krammer@mssm.edu](mailto:florian.krammer@mssm.edu)*

13 **Abstract**

14 After first emerging in December 2019 in China, severe acute respiratory syndrome 2 (SARS-  
15 CoV-2) has since caused a pandemic leading to millions of infections and deaths worldwide.  
16 Vaccines have been developed and authorized but supply of these vaccines is currently limited.  
17 With new variants of the virus now emerging and spreading globally, it is essential to develop  
18 therapeutics that are broadly protective and bind conserved epitopes in the receptor binding  
19 domain (RBD) or the whole spike of SARS-CoV-2. In this study, we have generated mouse  
20 monoclonal antibodies (mAbs) against different epitopes on the RBD and assessed binding and  
21 neutralization against authentic SARS-CoV-2. We have demonstrated that antibodies with  
22 neutralizing activity, but not non-neutralizing antibodies, lower viral titers in the lungs when  
23 administered in a prophylactic setting *in vivo* in a mouse challenge model. In addition, most of  
24 the mAbs cross-neutralize the B.1.351 as well as the B.1.1.7 variants *in vitro*.

25

26 **Importance**

27 Crossneutralization of SARS-CoV-2 variants by RBD-targeting antibodies is still not well  
28 understood and very little is known about the potential protective effect of non-neutralizing  
29 antibodies *in vivo*. Using a panel of mouse monoclonal antibodies, we investigate both of these  
30 aspects.

31

32 **Introduction**

33 SARS-CoV-2 first emerged in late 2019 in the province of Hubei in China, spread rapidly  
34 throughout the globe, and has since caused the ongoing coronavirus disease 2019 (COVID-19)  
35 pandemic (1, 2). Millions of infections have occurred globally and over two million deaths have  
36 been caused by this novel coronavirus. Over a hundred vaccines are currently in clinical  
37 development with three vaccines authorized for use in humans under the emergency use  
38 authorization (EUA) in the United States by the Food and Drug Administration (FDA) and

39 several additional ones approved in Europe, Latin America and Asia. Furthermore, several  
40 monoclonal antibodies (mAbs) as cocktails and an antiviral, remdesivir, have been authorized for  
41 use in humans as therapeutics and numerous others including antivirals are in development (3-6).

42 SARS-CoV-2, a positive-sense single-stranded RNA virus from the *Coronaviridae* family, is  
43 closely related to SARS-CoV-1 which caused a major outbreak in 2002-2004. Both viruses use  
44 the same receptor for entry into host cells, human angiotensin converting enzyme (hACE2) (7,  
45 8). The receptor binding domain (RBD) which is part of the spike protein of the virus can bind to  
46 hACE2 and mediate entry and thus, the spike protein makes for an excellent target for vaccines  
47 and therapeutics (9). It has been observed that serum from infected individuals as well as from  
48 vaccinated individuals contains a high level of antibodies against the spike protein and this serum  
49 shows high neutralizing activity (10-12). Antibodies induced by natural infection with SARS-  
50 CoV-2 correlate with protection and vaccination has been shown to be highly efficacious and  
51 effective as well. However, it is still crucial to develop therapeutics that can be used to treat  
52 individuals that are infected with SARS-CoV-2, particularly those at high risk for severe disease.  
53 While mAbs have been developed and approved for use, there remains a significant concern  
54 from the virus acquiring mutations that would lead to escape rendering the mAbs and vaccines  
55 inefficient in blocking virus and stopping replication of the virus in the body. Several lineages of  
56 SARS-CoV-2 with distinct and sometimes additional mutations in the spike protein have  
57 emerged over the last year(13). Mutations in the RBD region of the spike protein are a serious  
58 concern as most neutralizing antibodies target the RBD and block entry. Another region heavily  
59 mutated in the new circulating variant viruses is the N-terminal domain (NTD) which is also a  
60 target of neutralizing antibodies(14). Hence, the efficacy of vaccines and therapeutics could be  
61 compromised as more and more mutations in the NTD and RBD occur and persist in nature (15,  
62 16).

63 In this study, we isolated and characterized fourteen mouse mAbs against the RBD of SARS-  
64 CoV-2 and assessed their binding to recombinant RBD and spike protein as well as tested their  
65 ability to neutralize live virus. In addition, we tested if non-neutralizing mAbs can lower viral  
66 loads in a mouse challenge model. Due to the new variants of concern which have been detected,  
67 we also tested if mAbs can bind mutant RBDs that contain single amino acid changes as well as  
68 multiple mutations found in B.1.1.7, B.1.351 and P.1 RBDs. Lastly, we tested our panel of  
69 neutralizing mAbs against the B.1.1.7 virus isolate as well as B.1.351 virus isolate.

## 70 **Results**

71 **Generation of monoclonal antibodies.** After two vaccinations of BALB/c mice with  
72 recombinant RBD protein supplemented with poly I:C, murine hybridoma technology was used  
73 to generate hybridoma cell lines that secreted RBD-specific monoclonal antibodies (17-19).  
74 Fourteen unique hybridoma lines were isolated and picked that produced IgGs (**Table 1**). Twelve  
75 monoclonal antibodies belonged to the IgG1 isotype while two monoclonal antibodies were from  
76 the IgG2a subclass.

77 **All antibodies bind the RBD of SARS-CoV-2 and six mAbs can neutralize live virus.** Once  
78 all antibodies were purified from hybridoma supernatant, a standard enzyme-linked

79 immunosorbent assay (ELISA) was performed to assess binding of the monoclonal antibodies to  
80 the RBD of SARS-CoV-2 (**Figure 1A**), full spike of SARS-CoV-2 (**Figure 1B**), and RBD of  
81 SARS-CoV-1 (**Figure 1C**). All antibodies bound well to SARS-CoV-2 RBD and most had very  
82 low minimal binding concentrations (MBC). Of note, the MBC values for KL-S-1B5 and KL-S-  
83 2A1 (0.1 ug/ml) against SARS-CoV-2 RBD were higher than the rest of the antibodies,  
84 indicating lower affinity. Next, antibodies were tested in an ELISA against the full spike protein  
85 of SARS-CoV-2 (**Figure 1B**). It is interesting to note that while most mAbs bound well with low  
86 MBC values, KL-S-1B5, KL-S-1D11 and KL-S-2A1 had higher MBC values against spike  
87 compared to the RBD of SARS-CoV-2. It is possible that the epitope of these antibodies is  
88 partially occluded on the full spike compared to the RBD protein when expressed alone. To  
89 determine if antibodies were cross-reactive to the RBD of SARS-CoV-1, an ELISA was  
90 performed (**Figure 1C**). Most mAbs could not bind the RBD of SARS-CoV-1 except KL-S-  
91 1E10, KL-S-2A5, KL-S-3G9, and KL-S-3A5. To assess the functionality of the mAbs, all  
92 fourteen mAbs were tested in a microneutralization assay with authentic SARS-CoV-2 for their  
93 ability to neutralize live virus (**Figure 1D**). Six mAbs (43%) neutralized live virus well with low  
94 IC<sub>50</sub> values (0.1-1 ug/ml) indicating that low concentrations are capable of blocking virus entry  
95 and/or replication. Notably, KL-S-1D2 and KL-S-3A7 are extraordinarily low IC<sub>50</sub> values lower  
96 than 1 ug/ml.

97 **Antibodies can lower viral titers *in vivo* in a mouse challenge model.** To further study the  
98 biological functionality of these mAbs, all mAbs were tested *in vivo*. Hence, an animal model  
99 was utilized to test if antibodies are able to block viral entry and thus lower titers in the lung.  
100 Since mouse ACE2 does not facilitate entry of SARS-CoV-2, an adenovirus that expresses the  
101 human ACE2 gene was used to first transduce mice (20, 21). Five days later, monoclonal  
102 antibodies were administered at 10 mg/kg two hours prior to infection with SARS-CoV-2 and  
103 lungs were collected on day 3 and day 5 post infection to assess viral titers via a plaque assay.  
104 Only neutralizing mAbs were able to confer a protective benefit and lowered viral titers in the  
105 lungs (**Figure 2A-B**). On day 3, the group that received KL-S-1D2 and KL-S-2C3 had  
106 significantly less virus in the lungs compared to other groups highlighting the antibodies' ability  
107 to protect *in vivo*. KL-S-1F7, KL-S-1H12 and KL-S-2F9 treated animals had approximately two  
108 logs less virus in their lung compared to the negative control on day 3 (**Figure 2A**). The negative  
109 control used here was an irrelevant purified antibody, binding to influenza virus H10  
110 hemagglutinin (18). On day 5, groups that received the six neutralizing mAbs had little to no  
111 virus in their lungs (**Figure 2B**). One mouse in the KL-S-2C3 group and one mouse in the KL-S-  
112 2F9 showed residual virus in the lungs which could be a caveat of animal model used. None of  
113 the non-neutralizing antibodies conferred any protective benefit and all of these mAbs belonged  
114 to the IgG1 isotype.

115 **Neutralizing antibodies eliminate viral presence in the lungs and little differences were**  
116 **found between the groups in terms of lung pathology.** In addition to assessment of viral titers  
117 in the lungs in a prophylactic setting, we also wanted to test if mAbs can protect from  
118 inflammation and/or tissue damage in the lungs or lead to enhanced disease which has been  
119 noted for SARS-CoV-1 (22). Lungs were harvested on day 4 post vaccination from all the  
120 antibody groups (n=2) and subjected to pathological analysis (Histowiz) such as hematoxylin and

121 eosin (H&E) staining as well as immunohistochemistry (IHC) using an antibody specific for the  
122 nucleoprotein of SARS-CoV-2. A 5-point grading scheme that took into account six different  
123 parameters (“perivascular inflammation”, “bronchial/bronchiolar epithelial  
124 degeneration/necrosis”, “bronchial/bronchiolar inflammation”, “intraluminal debris”, “alveolar  
125 inflammation” and “congestion/edema”) was utilized to score lung sections. Interestingly, mice  
126 from all groups treated with antibodies displayed some pulmonary histopathological lesions of  
127 interstitial pneumonia (**Figure 3**). This could be a result of the high dose ( $10^5$  PFU per mouse) of  
128 SARS-CoV-2 used. The group that received only the AdV-hACE2 exhibited some microscopic  
129 lesions of perivascular, peri-bronchiolar and alveolar inflammation and had much lower scores  
130 compared to the antibody groups that received AdV-hACE2 plus SARS-CoV-2 (**Supplementary**  
131 **figure 1**). This demonstrates that there is some mild inflammation associated with intranasal  
132 administration of AdV-hACE2 alone and this has been observed in earlier studies (20).  
133 Histopathological lesions were uniformly absent in the mock group that received no treatment  
134 and were basically just naïve mice. Clinical scores were slightly higher for groups KL-S-1E10,  
135 KL-S-2A5 and KL-S-3A5. Both of these antibodies are non-neutralizing, but this could be a  
136 result of external variables in the experimental setup.

137 In terms of the nucleoprotein staining via IHC, it is clear that all neutralizing mAbs except KL-S-  
138 1H12 blocked entry and thus, very little staining for nucleoprotein was observed on day 4. This  
139 correlates well with the lung titers found in figure 2 as antibodies blocked viral entry/replication  
140 and lowered viral load in the lungs.

141 **Antibodies maintain binding to most variant RBDs.** Several variants of concern (VOC) with  
142 mutations in their RBD are circulating. In addition, studies on mAbs escape, in vitro evolution of  
143 the spike and clinical isolates from immunosuppressed patients have reported a variety of single  
144 mutations that may influence antibody binding to RBD. We expressed a number of these RBDs  
145 including N439K, Y453F, E484K, N501Y (B.1.1.7) and the RBDs of B.1.351 and P.1 and  
146 performed ELISAs on them using our mAbs. Such analysis can demonstrate the epitope of the  
147 antibody or the single amino acid that is crucial in its native state for binding. The neutralizing  
148 mAbs and non-neutralizing mAbs are shown separately (**Figure 4A and Figure 4B**) KL-S-1D2  
149 maintained binding to all RBDs but lost complete binding to K487R RBD (**Figure 4A**). This  
150 could be a very crucial amino acid for the antibody to maintain its footprint on the RBD. KL-S-  
151 2C3 bound at only 30% to the N487R RBD compared to wild type RBD. KL-S-1H12 lost a lot  
152 of binding to E484K, F486A, F490K and the B.1.351 RBD (**Figure 4A**). KL-S-1D11, KL-S-  
153 1F7, KL-S-2F9, KL-S-2G9 and KL-S-3A7 were able to bind all mutant RBDs at a level of 50%  
154 or even more compared to wild type RBD (**Figure 4A**). KL-S-1E10 and KL-S-2A1 lost binding  
155 to a large number of mutant RBDs (**Figure 4B**). The ability to bind all RBDs could be a function  
156 of antibody affinity which, when high, can allow the antibody to maintain its footprint. In  
157 general, neutralizing mAbs had comparable binding to both wild type and most mutant RBDs.  
158 To ensure that the ELISA setup was comparable, an anti-histidine antibody was used as a  
159 positive control.

160 **Four mAbs maintain neutralizing activity to B.1.351 virus while all six mAbs neutralize**  
161 **B.1.1.7 virus.** Since binding may not be directly related to neutralization, we wanted to assess if

162 antibodies that were generated by vaccination of mice with wild type RBD can neutralize new  
163 variant viruses. These variant viruses carry mutations in the RBD and can escape neutralization  
164 by monoclonal antibodies easily if their native epitope has been disrupted (6, 16). Notably, all  
165 antibodies that neutralized wild type SARS-CoV-2 were also able to neutralize the B.1.1.7 virus  
166 and this is not surprising as the only mutation present in the RBD of this virus is N501Y (**Figure**  
167 **4C**). However, KL-S-1D2 and KL-S-1H12 completely lost neutralizing activity towards B.1.351  
168 virus while the remaining four neutralizing mAbs maintained activity to this virus, although to  
169 various degrees (**Figure 4C**). KL-S-1D2 bound the RBD of B.1.351 at around 70% compared to  
170 wild type but loss of neutralization could be due to the epitope being presented differently on the  
171 full spike compared to RBD alone, leading to a loss of affinity. KL-S-1H12 showed much lower  
172 binding to E484K RBD as well as the B.1.351 RBD and this lower binding capability might be  
173 the reason for the loss of neutralization. The IC<sub>50</sub> value for KL-S-1F7 was 1.7 ug/ml for the wild  
174 type virus, 1.4 ug/ml for the B.1.1.7 virus and 4.3 ug/ml for the B.1.351 virus. The IC<sub>50</sub> value  
175 for KL-S-2C3 was 1.1 ug/ml for the wild type virus, 2.2 for the B.1.1.7 virus, and 5.5 ug/ml for  
176 the B.1.351 virus (**Figure 4C**).

177 **Three antibodies block ACE2 from binding the RBD.** To study where the neutralizing  
178 antibodies bind on the RBD, structural analysis was performed, and negative stain three  
179 dimensional reconstructions were obtained for four of the neutralizing antibodies (**Figure 5**).  
180 KL-S-1H12 and KL-S-2F9 did not form stable complexes and were therefore not amenable to  
181 image analysis, which could be a result of pH changes or low affinity/avidity of the Fab. KL-S-  
182 2C3 (**Figure 5A**), KL-S-1D2 (**Figure 5B**), and KL-S-3A7 (**Figure 5C**) overlap with the ACE2  
183 binding site, consistent with blockade of ACE2 binding to the RBD. The antibodies approach at  
184 different angles and appear to belong to Class 1 (KL-S-3A7 and KL-S-1D2) and Class 2 (KL-S-  
185 2C3) RBD epitopes (23). KLS-1F7 binds lower on the RBD to a similar epitope as S309 (**Figure**  
186 **5D**) (24).

187

## 188 **Discussion.**

189 The RBD of the spike protein of SARS-CoV-2 is relatively plastic and can tolerate extensive  
190 mutations, at least in *vitro*. The plasticity of the RBD is alarming because extensive changes in  
191 the RBD could reduce the efficacy of current vaccines and additional booster vaccinations with  
192 updated vaccines may be needed for protection in the future (15, 16). We tested all 14 isolated  
193 mAbs for binding to a whole panel of mutant RBDs. While some mAbs lost binding for many  
194 mutant RBDs, other mAbs maintained binding well across the board. However, binding was not  
195 in all cases directly linked to neutralization. All of the neutralizing mAbs maintained binding and  
196 neutralizing activity to B.1.1.7 (N501Y) relatively well. However, two mAbs lost neutralizing  
197 activity against B.1.351 and one of these mAbs only showed a relatively low reduction in  
198 binding to E484K and B.1.351 RBDs. The second one showed a stronger reduction in binding  
199 which agrees better with loss of neutralizing activity. Other hotspots for loss of binding for  
200 neutralizing antibodies included amino acid positions 487 and 490.

201 For four of the neutralizing mAbs low resolution structures were solved using single particle  
202 EM. They included KL-S-1D2 which lost neutralizing activity to B.1.351. Our low resolution  
203 structural analysis precludes interpretation of molecular interactions but the reduction or loss of  
204 neutralization of B.1.1.7 and B.1.351 by KL-S-1D2 suggests that N501 and E484 form critical  
205 interactions.

206 Protection *in vivo* by neutralizing mAbs could be a function of Fc-Fc receptor interaction. This  
207 has been shown for other mAbs developed against SARS-CoV-2 which showed less protection  
208 *in vivo* when the Fc was mutated (25). While the role of Fc-FcR interactions based effector  
209 functions for SARS-CoV-2 targeting antibodies is not fully understood yet, it is likely that these  
210 effector functions contribute to protection (26). This has also been demonstrated for influenza  
211 viruses as well as ebolaviruses (27, 28). We tested all isolated mAbs for their protective effect in  
212 a mouse model and found that the only correlation with protection was neutralizing activity  
213 while non-neutralizing antibodies had no effect. However, there is an important caveat that needs  
214 to be discussed for this experiment. All non-neutralizing antibodies that we isolated were of the  
215 IgG1 subtype, which in mice, is known to have low affinity for activating FcRs. This is in  
216 contrast to murine IgG2a and IgG2b which have high affinity for these FcRs. Therefore, we can  
217 only conclude that non-Fc-FcR based interactions do not contribute to protection by non-  
218 neutralizing antibodies. In fact, the two antibodies that provided the best protection, especially on  
219 day 3, KL-S-1D2 and KL-S-2C3, are both of the IgG2a subtype. While KL-S-1D2 showed the  
220 best *in vitro* neutralization of all isolated mAbs, which could cause this phenotype, KL-S-2C3's  
221 *in vitro* activity was lower but still showed stronger activity *in vivo* than other mAbs. This could  
222 be seen as evidence that Fc-FcR interactions, especially engagement with activating FcRs, which  
223 is an important component of protection. Of note, the vast majority of antibodies induced in  
224 humans to SARS-CoV-2 spike by natural infection or vaccination are IgG1 and in humans –  
225 unlike in mice - IgG1 has strong affinity for activating FcRs (29).

226 In summary, we describe several antibodies to the SARS-CoV-2 RBD that maintain strong  
227 neutralizing activity against the B.1.1.7 as well as B.1.351 variant. These mAbs, if humanized,  
228 may be further developed into 'variant resistant' therapeutics.

229

## 230 **Acknowledgements**

231 We would like to thank Dr. Randy Albrecht for oversight of the conventional Biosafety Level 3  
232 biocontainment facility which made this work possible. This work was partially funded by the  
233 NIAID Collaborative Influenza Vaccine Innovation Centers (CIVIC) contract  
234 75N93019C00051, NIAID Center of Excellence for Influenza Research and Surveillance  
235 (CEIRS, contract # HHSN272201400008C), by the generous support of the JPB Foundation and  
236 the Open Philanthropy Project (research grant 2020-215611 (5384); and by anonymous donors.

237

238 **Author contributions.** All authors have reviewed and approved the manuscript. F.A designed  
239 and performed experiments, analyzed data, and drafted the manuscript. S.S performed animal  
240 experiments. W.L and S.B performed structural analysis and prepared figures. L.C provided

241 virus stocks and analyzed data. A.W supervised the structural work and interpreted data. F.K  
242 conceptualized the whole study and drafted the manuscript.

243

#### 244 **Conflict of interest statement**

245 The Icahn School of Medicine at Mount Sinai has filed patent applications relating to SARS-  
246 CoV-2 serological assays and NDV-based SARS-CoV-2 vaccines which list Florian Krammer as  
247 co-inventor. Fatima Amanat is also listed on the serological assay patent application as a co-  
248 inventor. Mount Sinai has spun out a company, Kantaro, to market serological tests for SARS-  
249 CoV-2. Florian Krammer has consulted for Merck and Pfizer (before 2020), and is currently  
250 consulting for Pfizer, Seqirus and Avimex. The Krammer laboratory is also collaborating with  
251 Pfizer on animal models of SARS-CoV-2.

252

253

254

255

#### 256 **Materials and Methods**

257 **Cells and viruses.** Vero.E6 cells (ATCC CRL-1586) were maintained in Dulbecco's modified  
258 Eagle's medium (DMEM; Life Technologies) which was supplemented with 10% fetal bovine  
259 serum (FBS; Corning) as well as antibiotics (100 units/ml penicillin–100 µg/ml streptomycin  
260 [Pen-Strep; Gibco]), and buffer solution [1 M 4-(2-hydroxyethyl)-1-piperazineethanesulfonic  
261 acid (HEPES); Gibco]. SARS-CoV-2 was exclusively handled in a BSL3 facility and passaged in  
262 Vero.E6 for three days and the supernatant from infected cells was clarified via centrifugation at  
263 1000 g for 5 mins. The virus stock was titered in Vero.E6 cells as well.

264 **Generation of monoclonal antibodies.** All animal work was performed by adhering to  
265 institutional regulation as well as Institutional Animal Care and Use Committee (IACUC)  
266 guidelines. Six to eight weeks old, female, mice (Jackson Laboratories) were immunized with 3  
267 µgs of purified RBD of SARS-CoV-2 mixed with 10 µgs of poly I:C (Invivogen) twice with 3  
268 weeks interval (17, 29). All immunizations were administered via the intramuscular route.  
269 Finally, mice were immunized again with 100 µgs of RBD along with 10 µgs of poly I:C. Three  
270 days later, the mouse was sacrificed and the spleen was extracted in a sterile manner. The  
271 splenocytes were washed with phosphate buffered saline (Life Technologies; PBS) and then  
272 fused with SP2/o myeloma cells (ATCC) using polyethylene glycol (Sigma-Aldrich catalog #  
273 P7181). Hybridoma supernatants were screened in an enzyme-linked immunosorbent assay  
274 (ELISA) assay as described in the below section. Desirable hybridomas that secreted IgG were  
275 selected and expanded. Supernatants was collected at the end, filtered using a 0.22 µm filter and  
276 then purified via Protein G Sepharose (GE Health) using gravity flow (18, 27, 28, 30-34).

277 **ELISA.** Ninety-six well, flat-bottom, Immulon 4 HBX plates (Thermo Scientific) were coated  
278 overnight at 4°C with 50 µl/well of a 2 µg/ml solution of each respective protein in PBS. The  
279 next day, coating solution was discarded. One hundred µl per well of 3% non-fat milk prepared

280 in PBS containing 0.1% of Tween-20 (Fisher Bioreagents; T-PBS) was added to the plates for  
281 one hour at room temperature (RT) to block the plates. Antibody dilutions were prepared in 1%  
282 non-fat milk in T-PBS. The starting concentration used for each antibody was 30 ug/ml and  
283 three-fold dilutions were subsequently prepared. After the blocking solution had been on the  
284 plates for 1 hour, the antibody dilutions were added for 1 hour at RT. Next, the plates were  
285 washed thrice with 250 uls per well of T-PBS. The secondary solution was also prepared in 1%  
286 non-fat milk in T-PBS. For mouse antibodies, anti-mouse IgG conjugated to horseradish  
287 peroxidase (Rockland) was used at a dilution of 1:3000. For human antibodies, anti-human IgG  
288 Fab was used at the same dilution. After 1 hour, plates were washed thrice with 250 uls per well  
289 of T-PBS and developing solution was prepared using SigmaFast o-phenylenediamine  
290 dihydrochloride (OPD). One hundred uls per well of developing solution was added for exactly  
291 ten minutes after which the reaction was stopped by addition of 50 uls per well of 3M HCl  
292 (Fisher Bioreagents). Optical density at 490 nanometers was measured using a plate reader,  
293 BioTek Synergy H1. All data was analyzed using GraphPad Prism 7. An anti-histidine antibody  
294 was used for ELISAs as positive control (Takara, catalog # 631212).

295 **Microneutralization assay.** All antibodies were tested for neutralization capability in a  
296 neutralization assay with authentic SARS-CoV-2 isolate USA-WA1/2020 (BEI Resources NR-  
297 52281), isolate hCoV-19/South Africa/KRISP-K005325/2020 (BEI Resources NR-54009), and  
298 hCoV-19/England/204820464/2020 (BEI Resources NR-54000) in the BSL-3 facility. All  
299 viruses were obtained from BEI resources and propagated in Vero.E6 cells. Twenty-thousand  
300 Vero.E6 cells were seeded in a 96-well cell culture plate and used the next day. Antibody  
301 dilutions were prepared starting at 30 ug/ml and 3-fold subsequent dilutions were prepared. The  
302 protocol has been described earlier (21, 29, 35, 36). Cells were stained for the nucleoprotein and  
303 quantified. Percent inhibition was calculated and IC<sub>50</sub>s were obtained (35). All viruses were  
304 subjected to deep sequencing to ensure that no mutations had taken place in culture. The  
305 polybasic cleavage site changed to WRAR in the B.1.351 during passage in cell culture (as  
306 known for this virus at BEI Resources) and no other unexpected mutations occurred.

307 ***In vivo* mouse challenge studies.** All work with SARS-CoV-2 was performed in a BSL-3  
308 facility. Six -to 8-weeks old, female, BALB/c mice (Jackson Laboratories) were administered an  
309 adenovirus containing human ACE2 (AdV-hACE2) via the intranasal route at 2.5x10<sup>8</sup> plaque  
310 forming units (PFUs) per mouse in a final volume of 50 uls. Five days later, each respective  
311 antibody was administered via the intraperitoneal route at 10 mg/kg in 100 uls volume. Two  
312 hours later, mice were infected with 10<sup>5</sup> PFUs of SARS-CoV-2 intranasally. Mice were  
313 humanely sacrificed on day 3 and day 5 to assess viral titer in the lungs. Lungs were  
314 homogenized using a BeadBlaster 24 (Benchmark) homogenizer. Each lung homogenate was  
315 tested in a classical plaque assay as described earlier (27, 30).

316 **Plaque assay.** To assess viral titer in the lungs, each homogenate was diluted in 1X minimal  
317 essential medium (10X MEM; Life Technologies) supplemented with glutamine, 35% bovine  
318 serum albumin (BSA; MP Biomedicals), antibiotics, and HEPES as described earlier (29, 37).  
319 Three-hundred thousand Vero.E6 cells were seeded per well in a 12-well cell culture plate and  
320 used the next day when the cells were approximately 90% confluent. Media was removed from



321 cells and dilutions were added to the plates and incubated at 37 degree C incubator for 1 hour.  
322 Next, the virus dilutions were removed, and cells were overlaid with 2% oxoid agar mixed with  
323 2X MEM. After 3 days, cells were fixed with 10% paraformaldehyde (Polysciences) for 24 hours  
324 and then stained with anti-spike antibodies and plaques were counted.

325 **Histology and immunohistochemistry (IHC).** Mice were administered anesthesia and  
326 euthanized by exsanguination of the femoral artery. Lungs were inflated and flushed with 10%  
327 formaldehyde by injecting a needle through the trachea on day 4 post infection with SARS-CoV-  
328 2. Fixed lung samples were sent for processing to a commercial company, Histowiz. Sections  
329 were analyzed, images were taken, and sections were also scored by a pathologist. Scores were  
330 assigned by the pathologist based on six parameters, as mentioned in the results section. Both  
331 H&E staining as well as IHC was performed. An anti-SARS-CoV nucleoprotein antibody  
332 (Novus Biologicals cat. NB100–56576) was used for IHC.

333 **Expression and purification of recombinant spike proteins for electron microscopy.** The  
334 SARS-CoV-2 spike construct used for EM studies contains the mammalian-codon-optimized  
335 gene encoding residues 1-1208 of the spike followed by a C-terminal T4 fibrin trimerization  
336 domain, a HRV3C cleavage site and an 8x-His tag subcloned into the eukaryotic-expression  
337 vector pcDNA3.4. Amino acid mutations were introduced in the S1/S2 cleavage site (RRAR to  
338 GSAS) along with other stabilizing mutations including the HexaPro mutations (38). The spike  
339 trimers were expressed and purified as described previously (39).

340 **Negative stain EM sample preparation and data collection.** Spike protein was complexed  
341 with purified Fab at three times molar excess per trimer and incubated for thirty minutes at room  
342 temperature. Complexes were diluted to 0.02mg/ml in TBS and 3µl applied to a 400mesh Cu  
343 grid, blotted with filter paper, and stained with 2% uranyl formate for 30 seconds. Images were  
344 collected on a Tecnai Spirit microscope operating at 120 kV with a FEI Eagle CCD (4k) camera.  
345 Particles were picked using DogPicker and 3D classification was done using Relion 3.0 (40, 41).

346

## 347 **References**

- 348 1. Zhu N, Zhang D, Wang W, Li X, Yang B, Song J, Zhao X, Huang B, Shi W, Lu R, Niu P, Zhan F, Ma X,  
349 Wang D, Xu W, Wu G, Gao GF, Tan W, China Novel Coronavirus I, Research T. 2020. A Novel  
350 Coronavirus from Patients with Pneumonia in China, 2019. *N Engl J Med* 382:727-733.
- 351 2. Huang C, Wang Y, Li X, Ren L, Zhao J, Hu Y, Zhang L, Fan G, Xu J, Gu X, Cheng Z, Yu T, Xia J, Wei Y,  
352 Wu W, Xie X, Yin W, Li H, Liu M, Xiao Y, Gao H, Guo L, Xie J, Wang G, Jiang R, Gao Z, Jin Q, Wang  
353 J, Cao B. 2020. Clinical features of patients infected with 2019 novel coronavirus in Wuhan,  
354 China. *Lancet* 395:497-506.
- 355 3. White KM, Rosales R, Yildiz S, Kehrer T, Miorin L, Moreno E, Jangra S, Uccellini MB, Rathnasinghe  
356 R, Coughlan L, Martinez-Romero C, Batra J, Rojc A, Bouhaddou M, Fabius JM, Obernier K,  
357 Dejoze M, Guillen MJ, Losada A, Aviles P, Schotsaert M, Zwaka T, Vignuzzi M, Shokat KM,  
358 Krogan NJ, Garcia-Sastre A. 2021. Plitidepsin has potent preclinical efficacy against SARS-CoV-2  
359 by targeting the host protein eEF1A. *Science* 371:926-931.
- 360 4. Hattori SI, Higashi-Kuwata N, Hayashi H, Allu SR, Raghavaiah J, Bulut H, Das D, Anson BJ, Lendy  
361 EK, Takamatsu Y, Takamune N, Kishimoto N, Murayama K, Hasegawa K, Li M, Davis DA, Kodama

- 362 EN, Yarchoan R, Wlodawer A, Misumi S, Mesecar AD, Ghosh AK, Mitsuya H. 2021. A small  
363 molecule compound with an indole moiety inhibits the main protease of SARS-CoV-2 and blocks  
364 virus replication. *Nat Commun* 12:668.
- 365 5. Chen P, Nirula A, Heller B, Gottlieb RL, Boscia J, Morris J, Huhn G, Cardona J, Mocherla B, Stosor  
366 V, Shawa I, Adams AC, Van Naarden J, Custer KL, Shen L, Durante M, Oakley G, Schade AE, Sabo  
367 J, Patel DR, Klekotka P, Skovronsky DM, Investigators B-. 2021. SARS-CoV-2 Neutralizing  
368 Antibody LY-CoV555 in Outpatients with Covid-19. *N Engl J Med* 384:229-237.
- 369 6. Weinreich DM, Sivapalasingam S, Norton T, Ali S, Gao H, Bhore R, Musser BJ, Soo Y, Rofail D, Im  
370 J, Perry C, Pan C, Hosain R, Mahmood A, Davis JD, Turner KC, Hooper AT, Hamilton JD, Baum A,  
371 Kyratsous CA, Kim Y, Cook A, Kampman W, Kohli A, Sachdeva Y, Graber X, Kowal B, DiCioccio T,  
372 Stahl N, Lipsich L, Braunstein N, Herman G, Yancopoulos GD, Trial I. 2021. REGN-COV2, a  
373 Neutralizing Antibody Cocktail, in Outpatients with Covid-19. *N Engl J Med* 384:238-251.
- 374 7. Letko M, Marzi A, Munster V. 2020. Functional assessment of cell entry and receptor usage for  
375 SARS-CoV-2 and other lineage B betacoronaviruses. *Nat Microbiol* 5:562-569.
- 376 8. Hoffmann M, Kleine-Weber H, Schroeder S, Kruger N, Herrler T, Erichsen S, Schiergens TS,  
377 Herrler G, Wu NH, Nitsche A, Muller MA, Drosten C, Pohlmann S. 2020. SARS-CoV-2 Cell Entry  
378 Depends on ACE2 and TMPRSS2 and Is Blocked by a Clinically Proven Protease Inhibitor. *Cell*  
379 181:271-280 e8.
- 380 9. Wrapp D, Wang N, Corbett KS, Goldsmith JA, Hsieh CL, Abiona O, Graham BS, McLellan JS. 2020.  
381 Cryo-EM structure of the 2019-nCoV spike in the prefusion conformation. *Science* 367:1260-  
382 1263.
- 383 10. Wajnberg A, Amanat F, Firpo A, Altman DR, Bailey MJ, Mansour M, McMahon M, Meade P,  
384 Mendu DR, Muellers K, Stadlbauer D, Stone K, Strohmeier S, Simon V, Aberg J, Reich DL,  
385 Krammer F, Cordon-Cardo C. 2020. Robust neutralizing antibodies to SARS-CoV-2 infection  
386 persist for months. *Science* 370:1227-1230.
- 387 11. Jackson LA, Anderson EJ, Roupheal NG, Roberts PC, Makhene M, Coler RN, McCullough MP,  
388 Chappell JD, Denison MR, Stevens LJ, Pruijssers AJ, McDermott A, Flach B, Doria-Rose NA,  
389 Corbett KS, Morabito KM, O'Dell S, Schmidt SD, Swanson PA, 2nd, Padilla M, Mascola JR, Neuzil  
390 KM, Bennett H, Sun W, Peters E, Makowski M, Albert J, Cross K, Buchanan W, Pikaart-Tautges R,  
391 Ledgerwood JE, Graham BS, Beigel JH, m RNASG. 2020. An mRNA Vaccine against SARS-CoV-2 -  
392 Preliminary Report. *N Engl J Med* 383:1920-1931.
- 393 12. Voysey M, Costa Clemens SA, Madhi SA, Weckx LY, Folegatti PM, Aley PK, Angus B, Baillie VL,  
394 Barnabas SL, Bhorat QE, Bibi S, Briner C, Cicconi P, Clutterbuck EA, Collins AM, Cutland CL,  
395 Darton TC, Dheda K, Dold C, Duncan CJA, Emary KRW, Ewer KJ, Flaxman A, Fairlie L, Faust SN,  
396 Feng S, Ferreira DM, Finn A, Galiza E, Goodman AL, Green CM, Green CA, Greenland M, Hill C,  
397 Hill HC, Hirsch I, Izu A, Jenkin D, Joe CCD, Kerridge S, Koen A, Kwatra G, Lazarus R, Libri V, Lillie  
398 PJ, Marchevsky NG, Marshall RP, Mendes AVA, Milan EP, Minassian AM, et al. 2021. Single-dose  
399 administration and the influence of the timing of the booster dose on immunogenicity and  
400 efficacy of ChAdOx1 nCoV-19 (AZD1222) vaccine: a pooled analysis of four randomised trials.  
401 *Lancet*.
- 402 13. Chen AT, Altschuler K, Zhan SH, Chan YA, Deverman BE. 2021. COVID-19 CG enables SARS-CoV-2  
403 mutation and lineage tracking by locations and dates of interest. *Elife* 10.
- 404 14. McCallum M, Marco A, Lempp F, Tortorici MA, Pinto D, Walls AC, Beltramello M, Chen A, Liu Z,  
405 Zatta F, Zepeda S, di Iulio J, Bowen JE, Montiel-Ruiz M, Zhou J, Rosen LE, Bianchi S, Guarino B,  
406 Fregni CS, Abdelnabi R, Caroline Foo SY, Rothlauf PW, Bloyet LM, Benigni F, Cameroni E, Neyts J,  
407 Riva A, Snell G, Telenti A, Whelan SPJ, Virgin HW, Corti D, Pizzuto MS, Velesler D. 2021. N-  
408 terminal domain antigenic mapping reveals a site of vulnerability for SARS-CoV-2. *bioRxiv*.

- 409 15. Greaney AJ, Starr TN, Gilchuk P, Zost SJ, Binshtein E, Loes AN, Hilton SK, Huddleston J, Eguia R,  
410 Crawford KHD, Dingens AS, Nargi RS, Sutton RE, Suryadevara N, Rothlauf PW, Liu Z, Whelan SPJ,  
411 Carnahan RH, Crowe JE, Jr., Bloom JD. 2021. Complete Mapping of Mutations to the SARS-CoV-2  
412 Spike Receptor-Binding Domain that Escape Antibody Recognition. *Cell Host Microbe* 29:44-57  
413 e9.
- 414 16. Starr TN, Greaney AJ, Addetia A, Hannon WW, Choudhary MC, Dingens AS, Li JZ, Bloom JD. 2021.  
415 Prospective mapping of viral mutations that escape antibodies used to treat COVID-19. *Science*  
416 371:850-854.
- 417 17. Tan GS, Lee PS, Hoffman RM, Mazel-Sanchez B, Krammer F, Leon PE, Ward AB, Wilson IA, Palese  
418 P. 2014. Characterization of a broadly neutralizing monoclonal antibody that targets the fusion  
419 domain of group 2 influenza A virus hemagglutinin. *J Virol* 88:13580-92.
- 420 18. Wohlbold TJ, Chromikova V, Tan GS, Meade P, Amanat F, Comella P, Hirsh A, Krammer F. 2016.  
421 Hemagglutinin Stalk- and Neuraminidase-Specific Monoclonal Antibodies Protect against Lethal  
422 H10N8 Influenza Virus Infection in Mice. *J Virol* 90:851-61.
- 423 19. Amanat F, Meade P, Strohmeier S, Krammer F. 2019. Cross-reactive antibodies binding to H4  
424 hemagglutinin protect against a lethal H4N6 influenza virus challenge in the mouse model.  
425 *Emerg Microbes Infect* 8:155-168.
- 426 20. Rathnasinghe R, Strohmeier S, Amanat F, Gillespie VL, Krammer F, Garcia-Sastre A, Coughlan L,  
427 Schotsaert M, Uccellini MB. 2020. Comparison of transgenic and adenovirus hACE2 mouse  
428 models for SARS-CoV-2 infection. *Emerg Microbes Infect* 9:2433-2445.
- 429 21. Amanat F, Strohmeier S, Rathnasinghe R, Schotsaert M, Coughlan L, Garcia-Sastre A, Krammer F.  
430 2020. Introduction of two prolines and removal of the polybasic cleavage site leads to optimal  
431 efficacy of a recombinant spike based SARS-CoV-2 vaccine in the mouse model. *bioRxiv*.
- 432 22. Tseng CT, Sbrana E, Iwata-Yoshikawa N, Newman PC, Garron T, Atmar RL, Peters CJ, Couch RB.  
433 2012. Immunization with SARS coronavirus vaccines leads to pulmonary immunopathology on  
434 challenge with the SARS virus. *PLoS One* 7:e35421.
- 435 23. Barnes CO, Jette CA, Abernathy ME, Dam KA, Esswein SR, Gristick HB, Malyutin AG, Sharaf NG,  
436 Huey-Tubman KE, Lee YE, Robbani DF, Nussenzweig MC, West AP, Jr., Bjorkman PJ. 2020. SARS-  
437 CoV-2 neutralizing antibody structures inform therapeutic strategies. *Nature* 588:682-687.
- 438 24. Pinto D, Park YJ, Beltramello M, Walls AC, Tortorici MA, Bianchi S, Jaconi S, Culap K, Zatta F, De  
439 Marco A, Peter A, Guarino B, Spreafico R, Cameroni E, Case JB, Chen RE, Havenar-Daughton C,  
440 Snell G, Telenti A, Virgin HW, Lanzavecchia A, Diamond MS, Fink K, Velesler D, Corti D. 2020.  
441 Cross-neutralization of SARS-CoV-2 by a human monoclonal SARS-CoV antibody. *Nature*  
442 583:290-295.
- 443 25. Schafer A, Muecksch F, Lorenzi JCC, Leist SR, Cipolla M, Bournazos S, Schmidt F, Maison RM,  
444 Gazumyan A, Martinez DR, Baric RS, Robbani DF, Hatzioannou T, Ravetch JV, Bieniasz PD,  
445 Bowen RA, Nussenzweig MC, Sheahan TP. 2021. Antibody potency, effector function, and  
446 combinations in protection and therapy for SARS-CoV-2 infection in vivo. *J Exp Med* 218.
- 447 26. Gorman MJ, Patel N, Guebre-Xabier M, Zhu A, Atyeo C, Pullen KM, Loos C, Goetz-Gazi Y, Carrion  
448 R, Tian J-H, Yaun D, Bowman K, Zhou B, Maciejewski S, McGrath ME, Logue J, Frieman MB,  
449 Montefiori D, Mann C, Schendel S, Amanat F, Krammer F, Sapphire EO, Lauffenburger D, Greene  
450 AM, Portnoff AD, Massare MJ, Ellingsworth L, Glenn G, Smith G, Alter G. 2021. Collaboration  
451 between the Fab and Fc contribute to maximal protection against SARS-CoV-2 in nonhuman  
452 primates following NVX-CoV2373 subunit vaccine with Matrix-M™ vaccination.  
453 *bioRxiv:2021.02.05.429759*.
- 454 27. Duehr J, Wohlbold TJ, Oestereich L, Chromikova V, Amanat F, Rajendran M, Gomez-Medina S,  
455 Mena I, tenOever BR, Garcia-Sastre A, Basler CF, Munoz-Fontela C, Krammer F. 2017. Novel

- 456 Cross-Reactive Monoclonal Antibodies against Ebolavirus Glycoproteins Show Protection in a  
457 Murine Challenge Model. *J Virol* 91.
- 458 28. Asthagiri Arunkumar G, Ioannou A, Wohlbold TJ, Meade P, Aslam S, Amanat F, Ayllon J, Garcia-  
459 Sastre A, Krammer F. 2019. Broadly Cross-Reactive, Nonneutralizing Antibodies against Influenza  
460 B Virus Hemagglutinin Demonstrate Effector Function-Dependent Protection against Lethal Viral  
461 Challenge in Mice. *J Virol* 93.
- 462 29. Amanat F, Stadlbauer D, Strohmeier S, Nguyen THO, Chromikova V, McMahon M, Jiang K,  
463 Arunkumar GA, Jurczynszak D, Polanco J, Bermudez-Gonzalez M, Kleiner G, Aydillo T, Miorin L,  
464 Fierer DS, Lugo LA, Kojic EM, Stoeber J, Liu STH, Cunningham-Rundles C, Felgner PL, Moran T,  
465 Garcia-Sastre A, Caplivski D, Cheng AC, Kedzierska K, Vapalahti O, Hepojoki JM, Simon V,  
466 Krammer F. 2020. A serological assay to detect SARS-CoV-2 seroconversion in humans. *Nat Med*  
467 26:1033-1036.
- 468 30. Wohlbold TJ, Podolsky KA, Chromikova V, Kirkpatrick E, Falconieri V, Meade P, Amanat F, Tan J,  
469 tenOever BR, Tan GS, Subramaniam S, Palese P, Krammer F. 2017. Broadly protective murine  
470 monoclonal antibodies against influenza B virus target highly conserved neuraminidase  
471 epitopes. *Nat Microbiol* 2:1415-1424.
- 472 31. Amanat F, Duehr J, Oestereich L, Hastie KM, Ollmann Saphire E, Krammer F. 2018. Antibodies to  
473 the Glycoprotein GP2 Subunit Cross-React between Old and New World Arenaviruses. *mSphere*  
474 3.
- 475 32. Stadlbauer D, Amanat F, Strohmeier S, Nachbagauer R, Krammer F. 2018. Cross-reactive mouse  
476 monoclonal antibodies raised against the hemagglutinin of A/Shanghai/1/2013 (H7N9) protect  
477 against novel H7 virus isolates in the mouse model. *Emerg Microbes Infect* 7:110.
- 478 33. Stadlbauer D, Rajabhathor A, Amanat F, Kaplan D, Masud A, Treanor JJ, Izikson R, Cox MM,  
479 Nachbagauer R, Krammer F. 2017. Vaccination with a Recombinant H7 Hemagglutinin-Based  
480 Influenza Virus Vaccine Induces Broadly Reactive Antibodies in Humans. *mSphere* 2.
- 481 34. Strohmeier S, Amanat F, Krammer F. 2019. Cross-Reactive Antibodies Binding to the Influenza  
482 Virus Subtype H11 Hemagglutinin. *Pathogens* 8.
- 483 35. Amanat F, White KM, Miorin L, Strohmeier S, McMahon M, Meade P, Liu WC, Albrecht RA,  
484 Simon V, Martinez-Sobrido L, Moran T, Garcia-Sastre A, Krammer F. 2020. An In Vitro  
485 Microneutralization Assay for SARS-CoV-2 Serology and Drug Screening. *Curr Protoc Microbiol*  
486 58:e108.
- 487 36. Sun W, Leist SR, McCroskery S, Liu Y, Slamanig S, Oliva J, Amanat F, Schafer A, Dinnon KH, 3rd,  
488 Garcia-Sastre A, Krammer F, Baric RS, Palese P. 2020. Newcastle disease virus (NDV) expressing  
489 the spike protein of SARS-CoV-2 as a live virus vaccine candidate. *EBioMedicine* 62:103132.
- 490 37. Duehr J, McMahon M, Williamson B, Amanat F, Durbin A, Hawman DW, Noack D, Uhl S, Tan GS,  
491 Feldmann H, Krammer F. 2020. Neutralizing Monoclonal Antibodies against the Gn and the Gc of  
492 the Andes Virus Glycoprotein Spike Complex Protect from Virus Challenge in a Preclinical  
493 Hamster Model. *mBio* 11.
- 494 38. Hsieh CL, Goldsmith JA, Schaub JM, DiVenere AM, Kuo HC, Javanmardi K, Le KC, Wrapp D, Lee  
495 AG, Liu Y, Chou CW, Byrne PO, Hjorth CK, Johnson NV, Ludes-Meyers J, Nguyen AW, Park J,  
496 Wang N, Amengor D, Lavinder JJ, Ippolito GC, Maynard JA, Finkelstein IJ, McLellan JS. 2020.  
497 Structure-based design of prefusion-stabilized SARS-CoV-2 spikes. *Science* 369:1501-1505.
- 498 39. Brouwer PJM, Caniels TG, van der Straten K, Snitselaar JL, Aldon Y, Bangaru S, Torres JL, Okba  
499 NMA, Claireaux M, Kerster G, Bentlage AEH, van Haaren MM, Guerra D, Burger JA, Schermer EE,  
500 Verheul KD, van der Velde N, van der Kooi A, van Schooten J, van Breemen MJ, Bijl TPL, Sliepen  
501 K, Aartse A, Derking R, Bontjer I, Kootstra NA, Wiersinga WJ, Vidarsson G, Haagmans BL, Ward  
502 AB, de Bree GJ, Sanders RW, van Gils MJ. 2020. Potent neutralizing antibodies from COVID-19  
503 patients define multiple targets of vulnerability. *Science* 369:643-650.

- 504 40. Voss NR, Yoshioka CK, Radermacher M, Potter CS, Carragher B. 2009. DoG Picker and TiltPicker:  
505 software tools to facilitate particle selection in single particle electron microscopy. *J Struct Biol*  
506 166:205-13.
- 507 41. Zivanov J, Nakane T, Forsberg BO, Kimanius D, Hagen WJ, Lindahl E, Scheres SH. 2018. New tools  
508 for automated high-resolution cryo-EM structure determination in RELION-3. *Elife* 7.

509

510

## 511 **Figure legends**

512 **Figure 1. All mAbs bind to recombinant RBD and six mAbs neutralize SARS-COV-2. (A)**  
513 Binding of all isolated mAbs (n=14) via an ELISA assay was assessed against recombinant RBD  
514 protein and the MBC values are shown. The positive control used was a human antibody against  
515 SARS-CoV-1 RBD, CR3022 while the negative control used was a mouse anti-influenza H10  
516 antibody. Binding of all isolated mAbs was also tested on ELISA against the spike protein of  
517 SARS-CoV-2 (B) as well as SARS-CoV-1 RBD (C). (D) Neutralization activity of all mAbs  
518 was tested in a microneutralization assay with authentic SARS-CoV-2 (USA-WA1/2020)  
519 starting at 30 ug/ml and testing subsequent 3-fold dilutions. The cells were stained for  
520 nucleoprotein of SARS-CoV-2 and the IC<sub>50</sub> values were calculated via non-linear regression fit.  
521 All experiments were performed with duplicates.

522 **Figure 2. Only neutralizing mAbs lower viral loads *in vivo* in a AdV-hACE2 mouse**  
523 **challenge model.** The protective efficacy of the mAbs was assessed *in vivo* in a prophylactic  
524 setting. Mice were administered 2.5\* 10<sup>8</sup> PFUs per mouse of AdV-hACE2 and five days later,  
525 mice were administered each mAb (n=4) at 10 mg/kg and challenged with 10<sup>5</sup> PFUs of SARS-  
526 CoV-2. Viral titers in the lungs were assessed at day 3 (A) and day 5 (B) via a plaque assay.  
527 Mice in the negative control group received a mouse anti-influenza H10 antibody.

528 **Figure 3. Immunopathological effects post mAb administration in the lungs. (A)** In order to  
529 assess if antibodies can have any negative immunopathological effects, lungs were harvested  
530 from each antibody group (n=2) as shown. Two mice received only the AdV-hACE2 while two  
531 mice were naïve. An anti-nucleoprotein antibody was used to check for presence of virus in the  
532 lungs. (B)

533 **Figure 4. Binding of mAbs to variant RBDs as well cross-neutralization of B.1.1.7 and**  
534 **B.1.351 variant viruses.** All fourteen antibodies (A-B) were tested in ELISA assays for binding  
535 to RBDs that contain single or multiple mutations found in new variants. The line at 100%  
536 indicates binding to wild type and binding to each mutant RBD is graphed as percent binding  
537 compared to wild type. A negative control mAb, anti-influenza H10, was run against all the  
538 RBDs to ensure that there is no unspecific binding. A positive control, anti-histidine antibody,  
539 was used to ensure that the RBD proteins that have a hexa-histidine tag are coated properly.  
540 Neutralizing mAbs (A) and non-neutralizing mAbs (B) are shown separately. (C) A  
541 microneutralization assay was performed to test whether the neutralizing mAbs can also  
542 neutralize new variant viruses, B.1.1.7 and B.1.351. IC<sub>50</sub> values of the six neutralizing mAbs for

543 each virus are shown. **(D)** Remdesivir was also run on a neutralization assay against the wild  
544 type virus, B.1.1.7 isolate as well as B.1.351 isolate.

545 **Figure 5. Negative stain EM analysis of Fabs bound to SARS-CoV-2 S trimer. 3D**  
546 reconstructions of Fabs **(A)** KL-S-2C3 (Blue), **(B)** KL-S-1D2 (pink), **(C)** KL-S-3A7 (green) and  
547 **(D)** 1F7 (orange) bound to SARS-CoV-2 stabilized trimer (grey). A model of spike trimer bound  
548 to ACE2 receptor (PDB# 7KNB) is fit into each density to illustrate their potential for blocking  
549 receptor binding.

550

551 **Supplementary figure 1.** Clinical scores from the lung sections from each antibody group (n=2)  
552 are shown. All sections were scored by an independent veterinary pathologist. In addition to  
553 negative control, one control group received only AdV-hACE2 while naïve mice were also  
554 included as mock control. Scale bar represents 500 um.

555

556

557

558 **Table 1**

| mAb       | Isotype |
|-----------|---------|
| KL-S-1B5  | IgG1    |
| KL-S-1D2  | IgG2a   |
| KL-S-1D11 | IgG1    |
| KL-S-1E10 | IgG1    |
| KL-S-1F7  | IgG1    |
| KL-S-1H12 | IgG1    |
| KL-S-2A1  | IgG1    |
| KL-S-2A5  | IgG1    |
| KL-S-2C3  | IgG2a   |
| KL-S-2F1  | IgG1    |
| KL-S-2F9  | IgG1    |
| KL-S-2G9  | IgG1    |
| KL-S-3A5  | IgG1    |
| KL-S-3A7  | IgG1    |

559

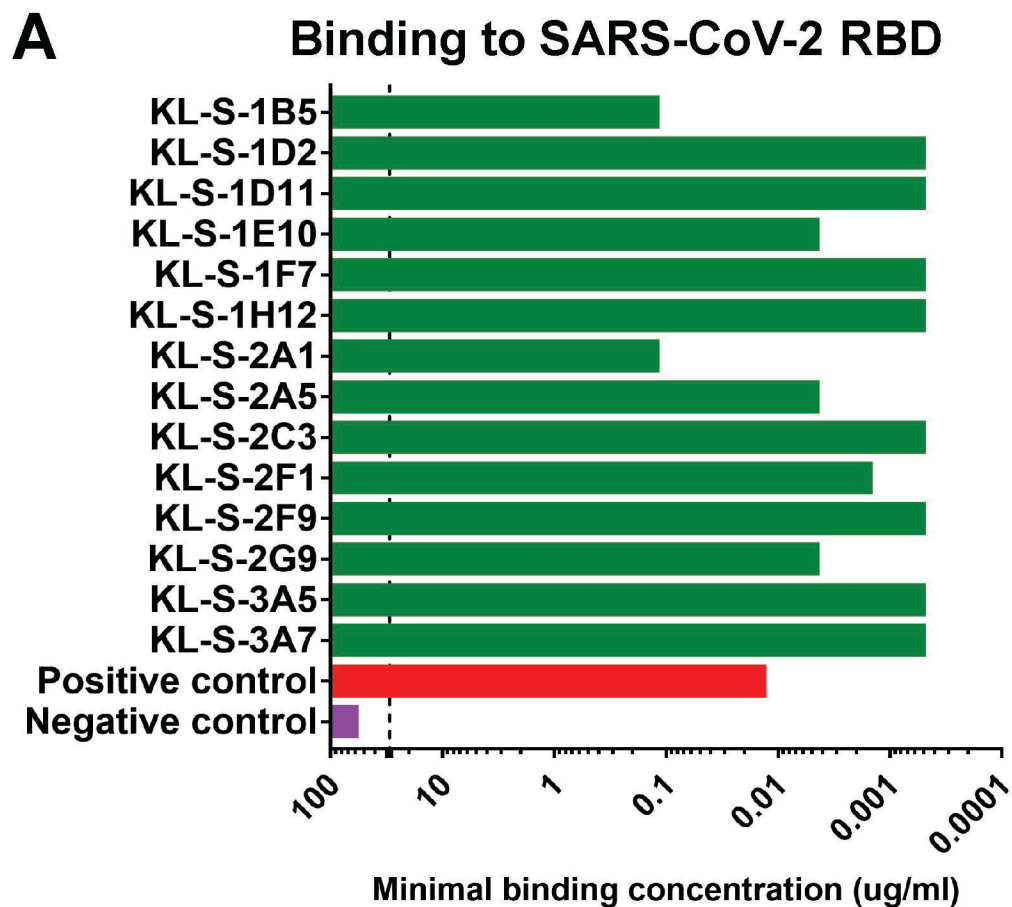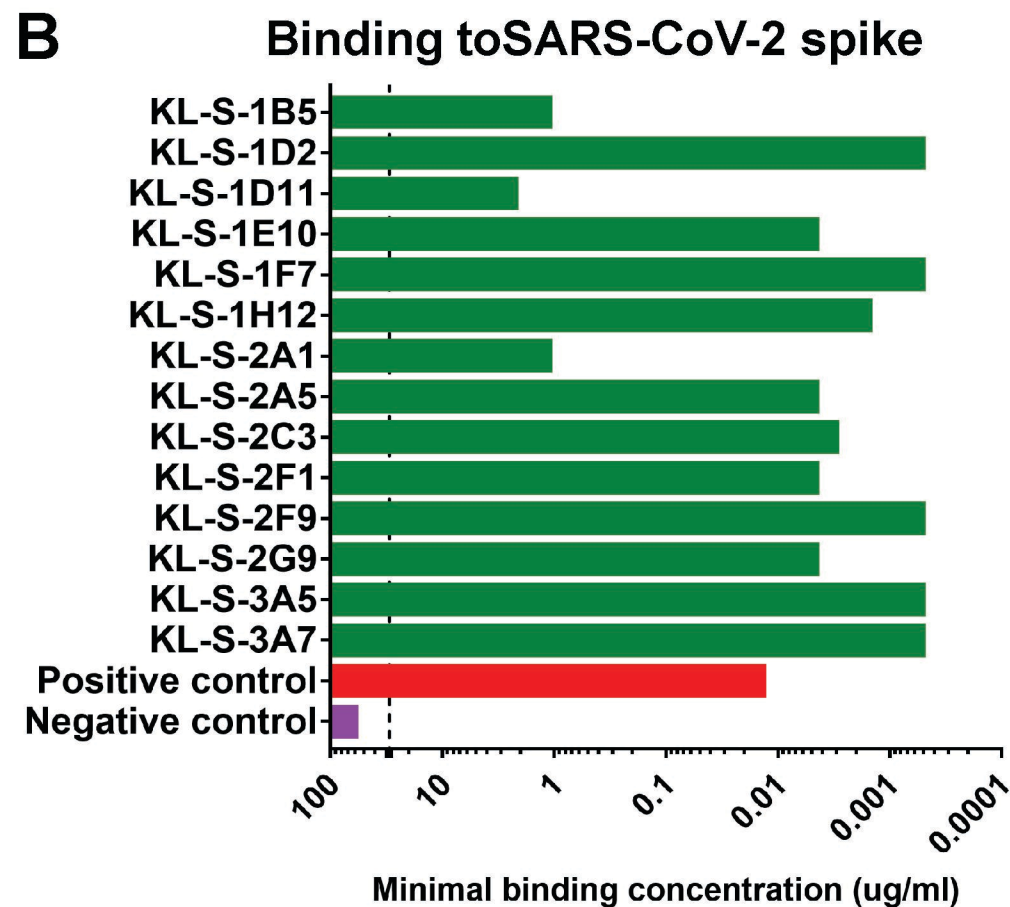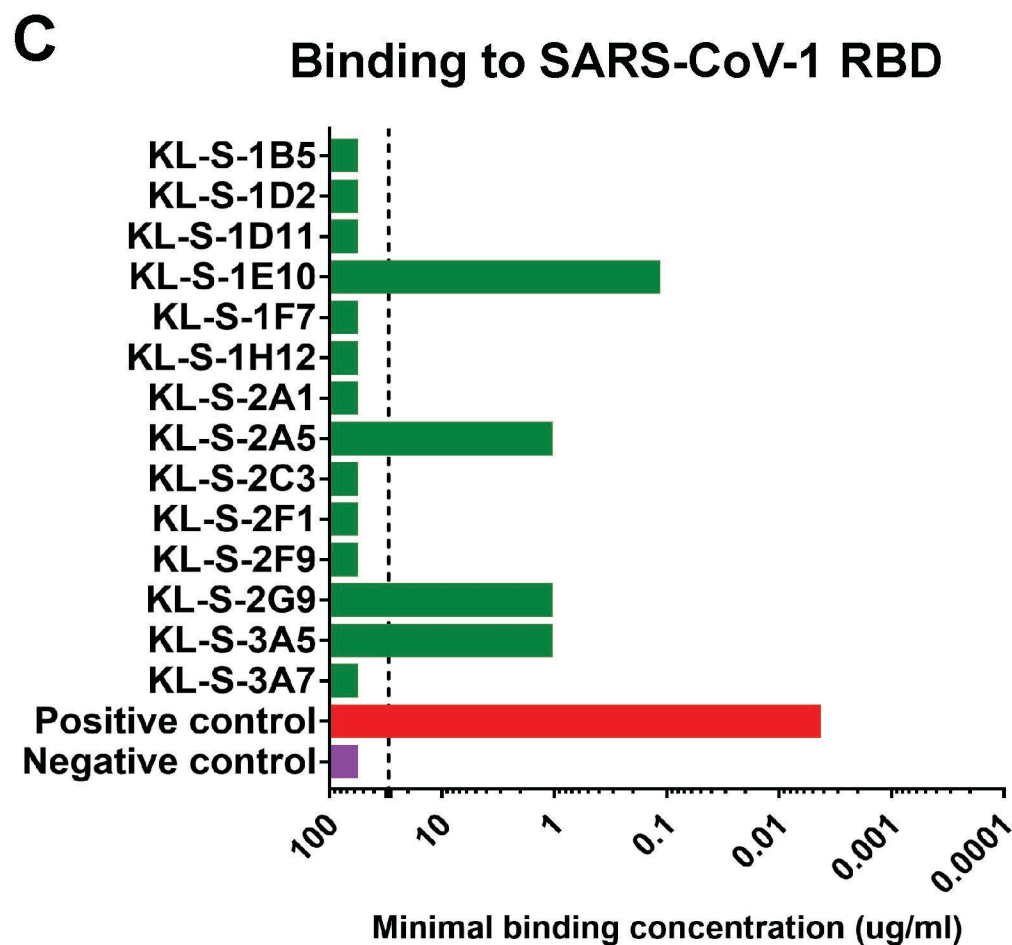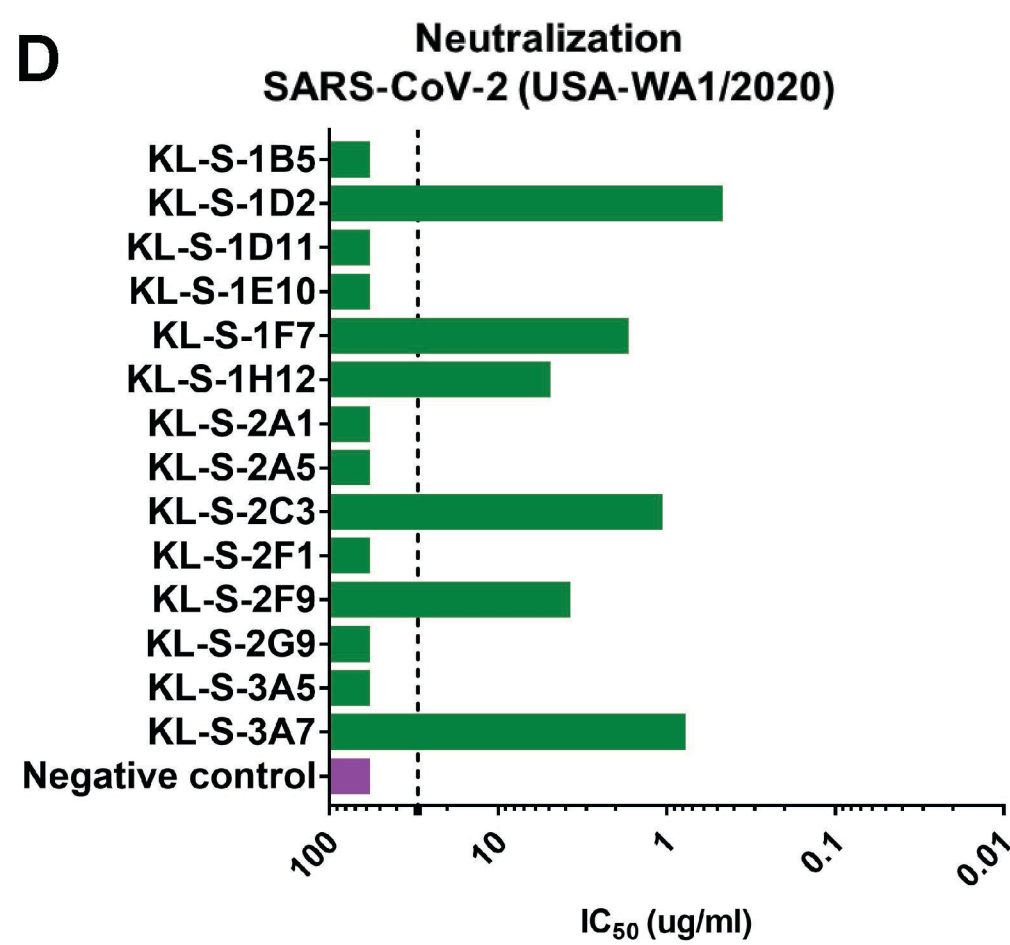

**A****Day 3 lung titers**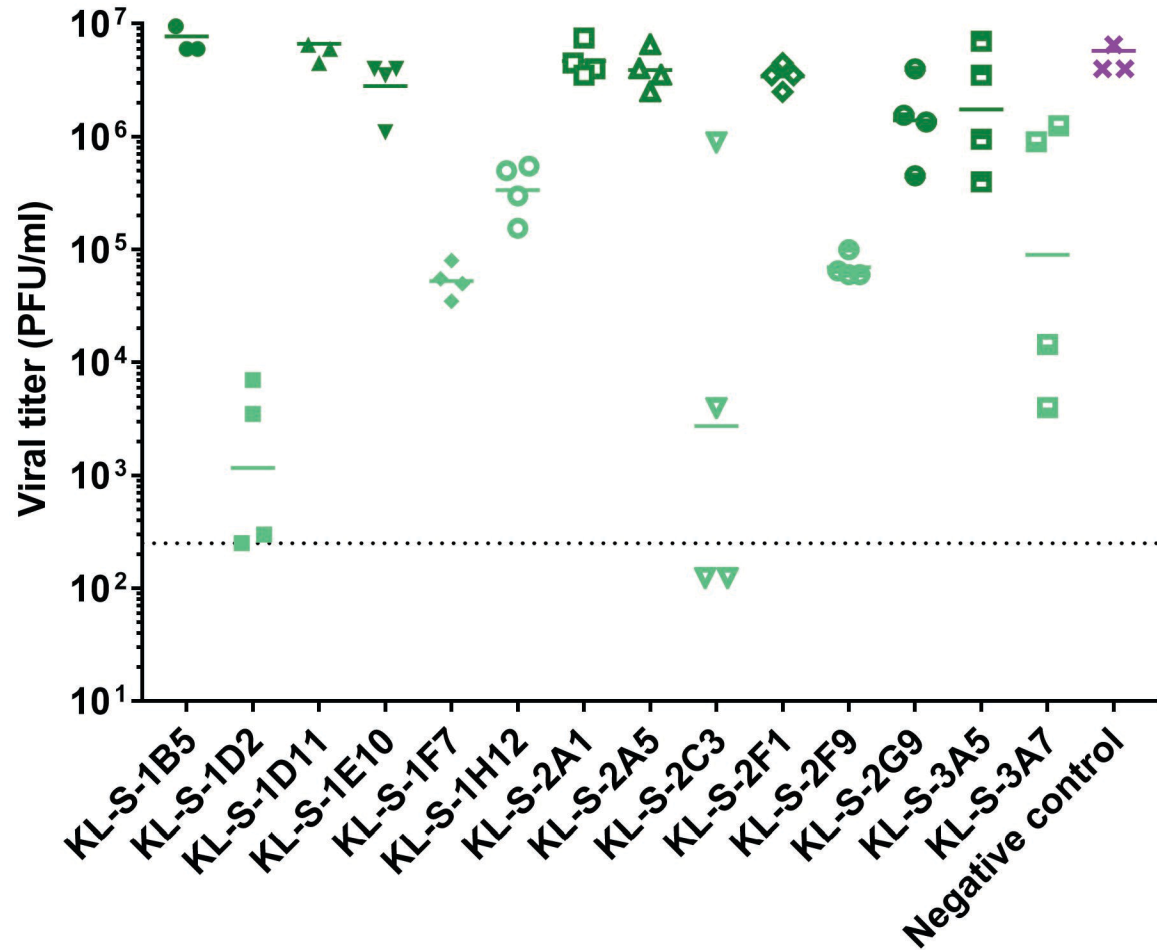**B****Day 5 lung titers**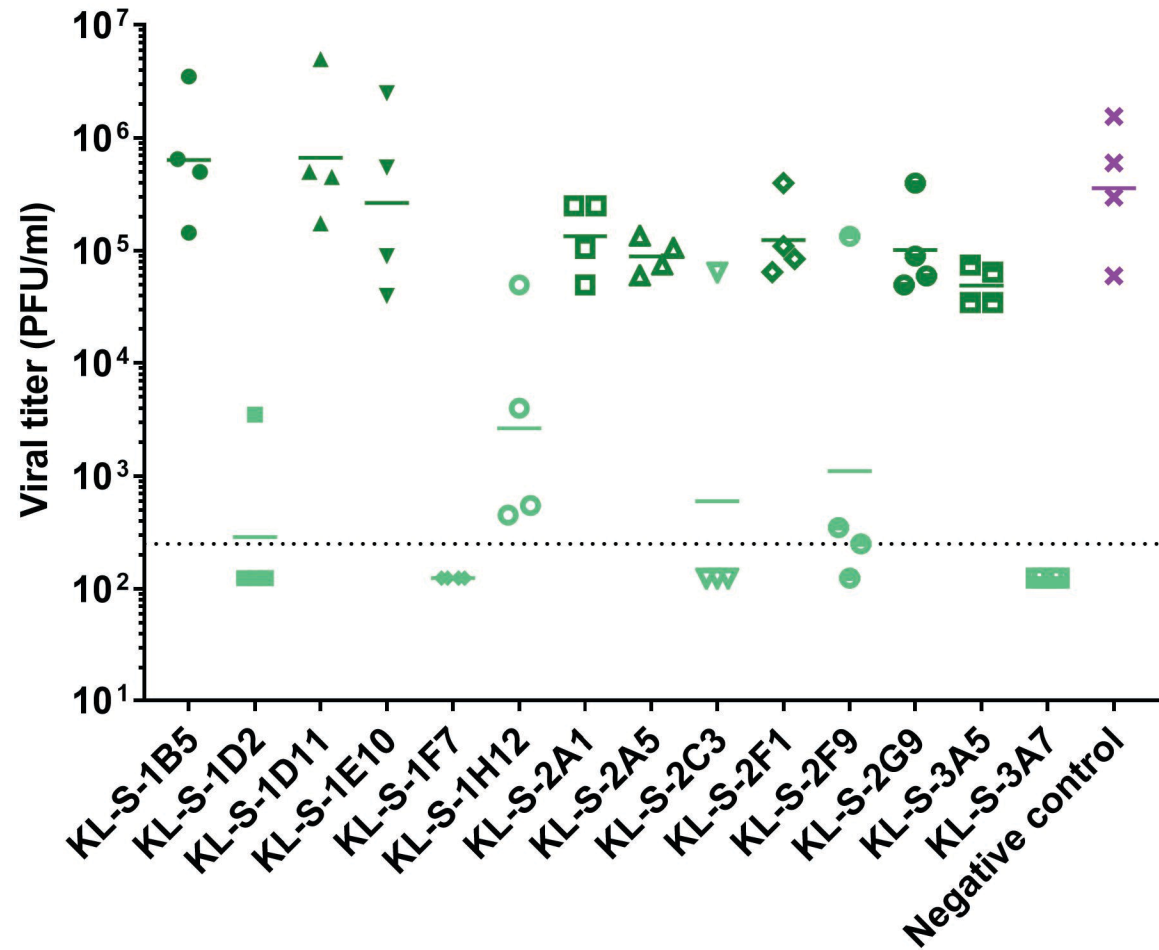



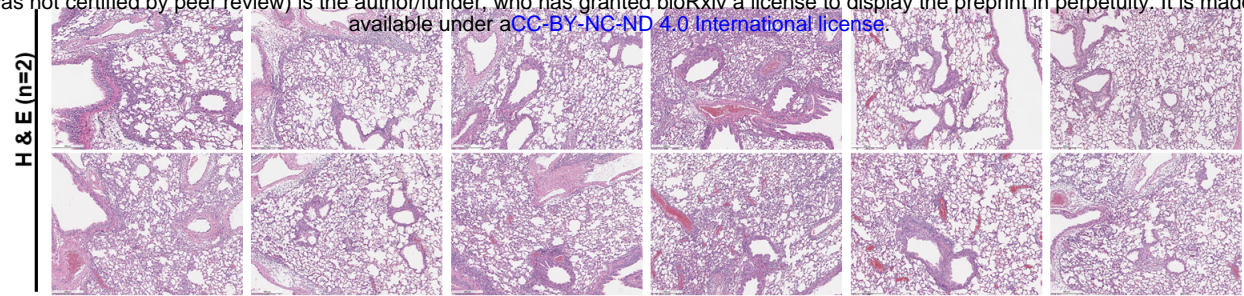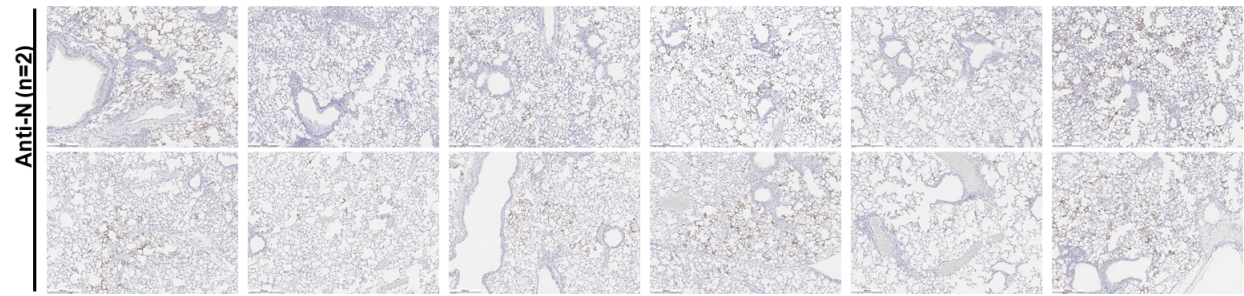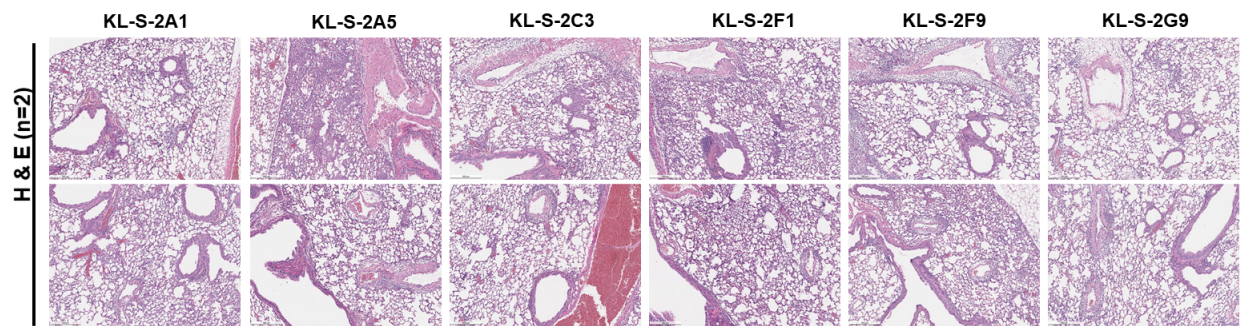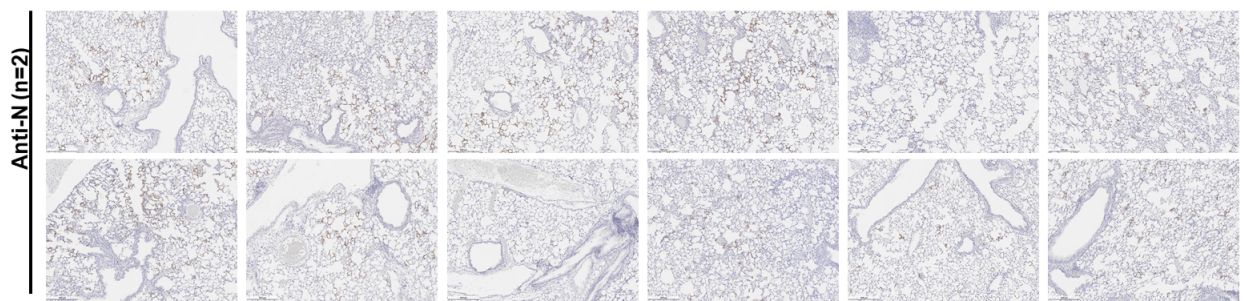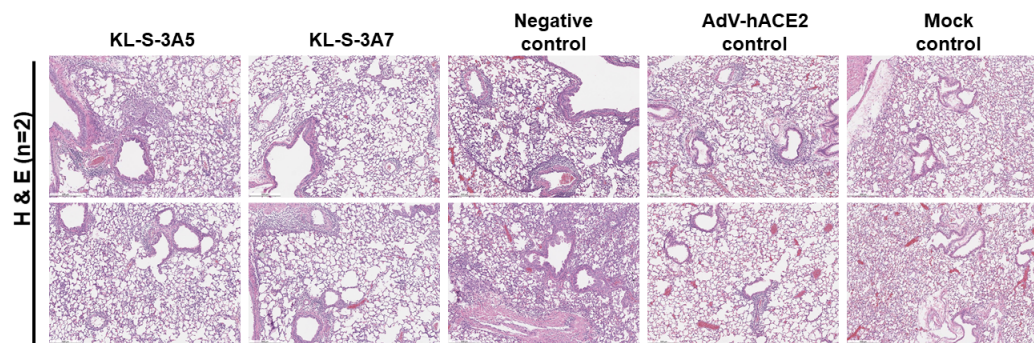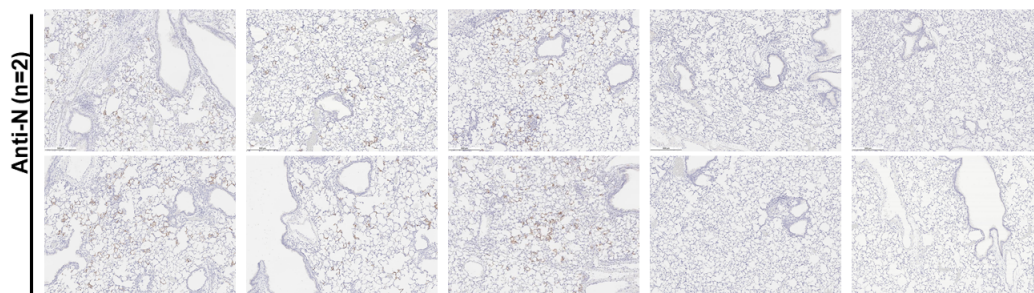

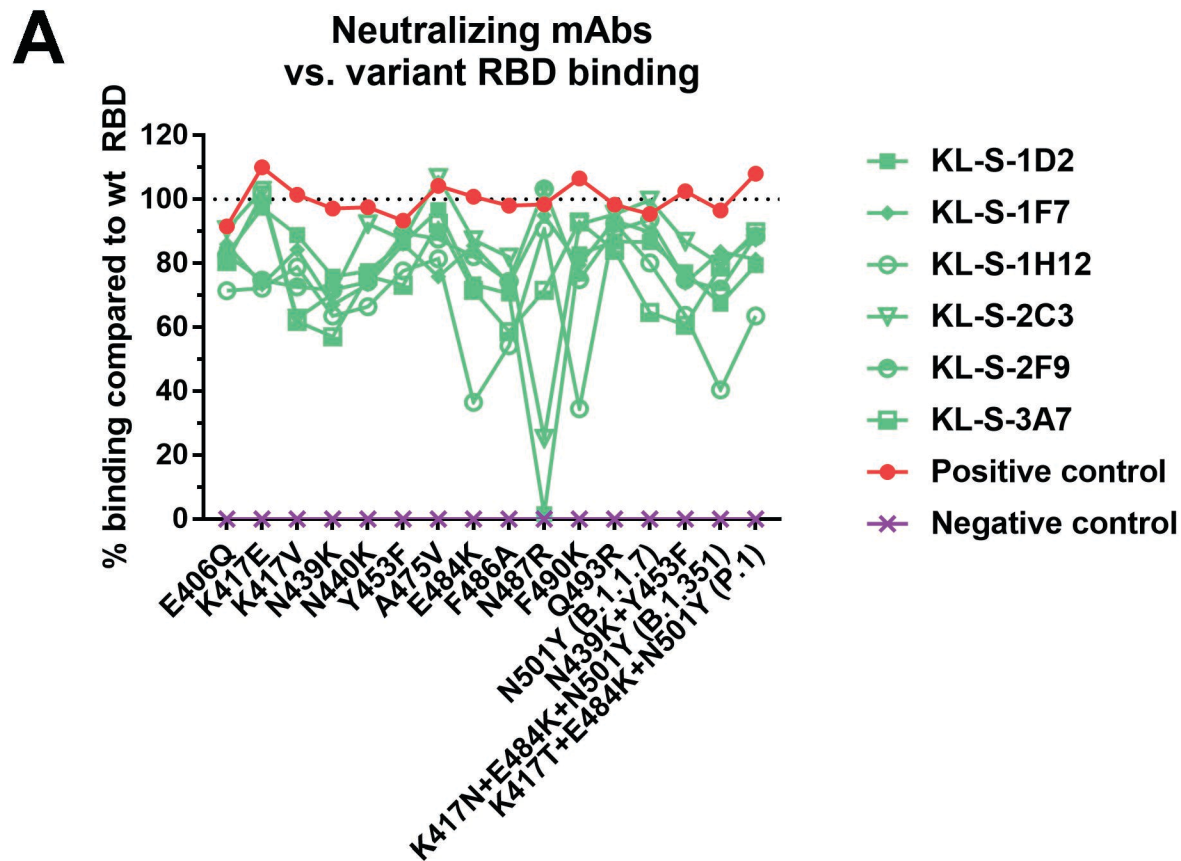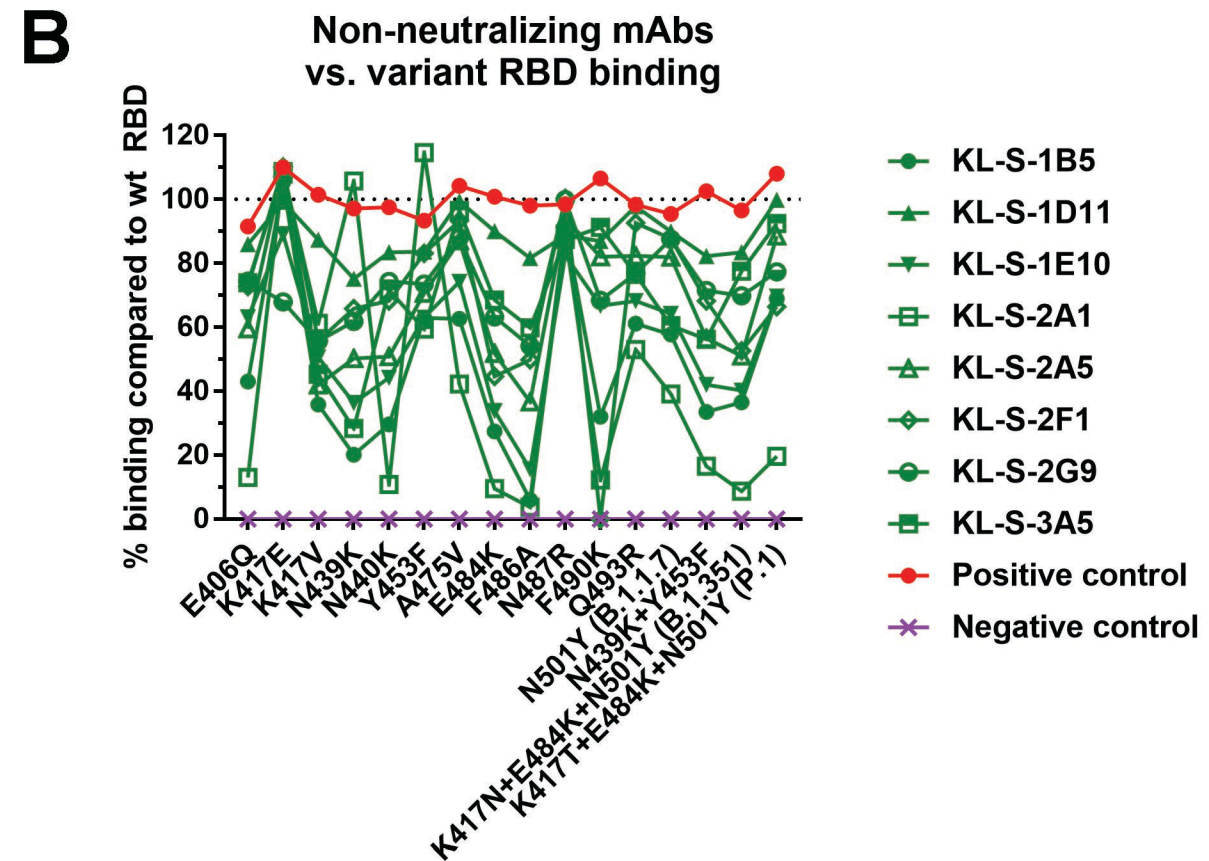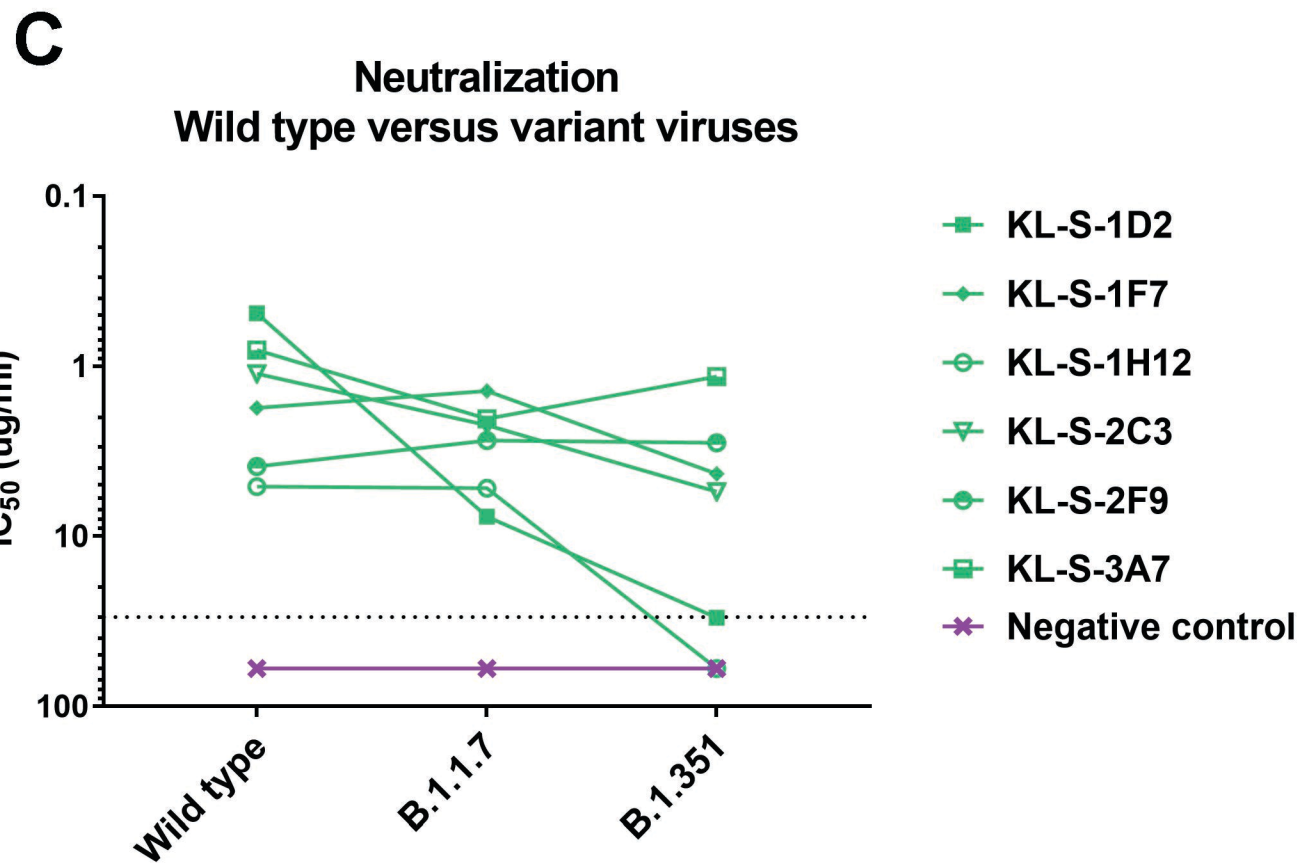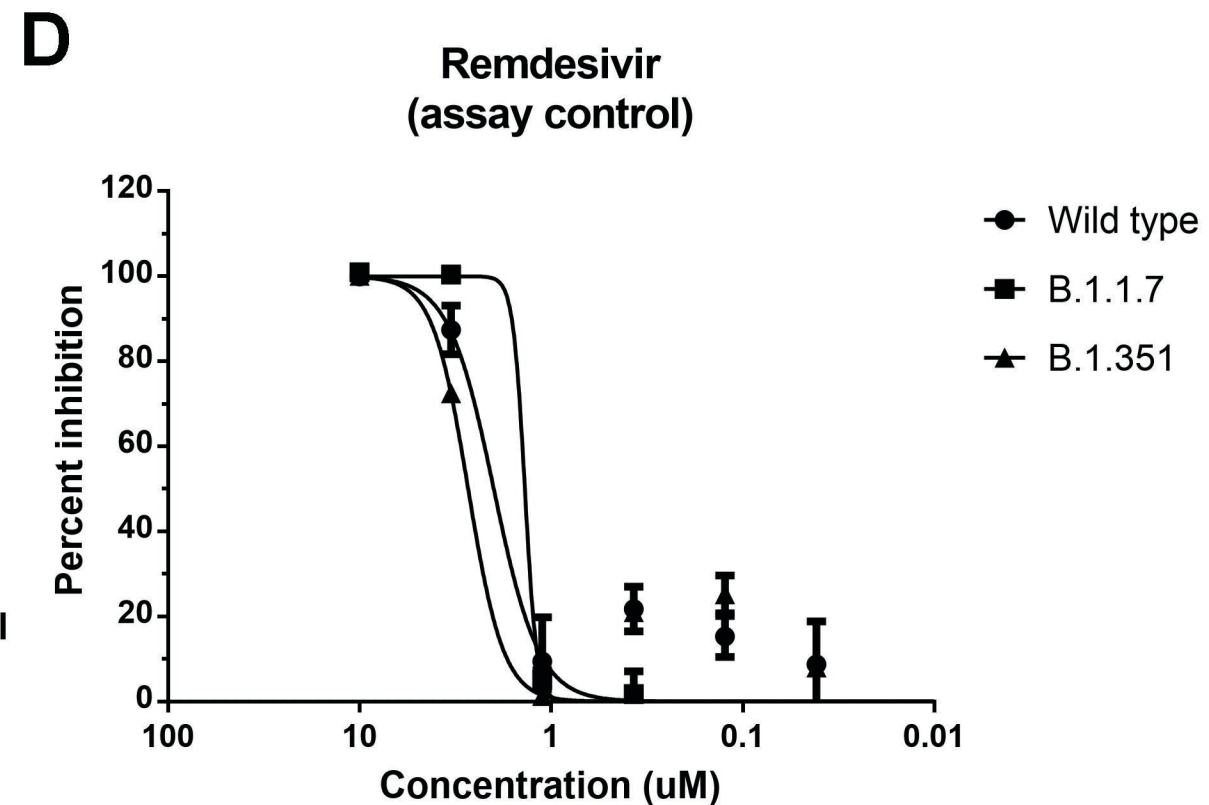

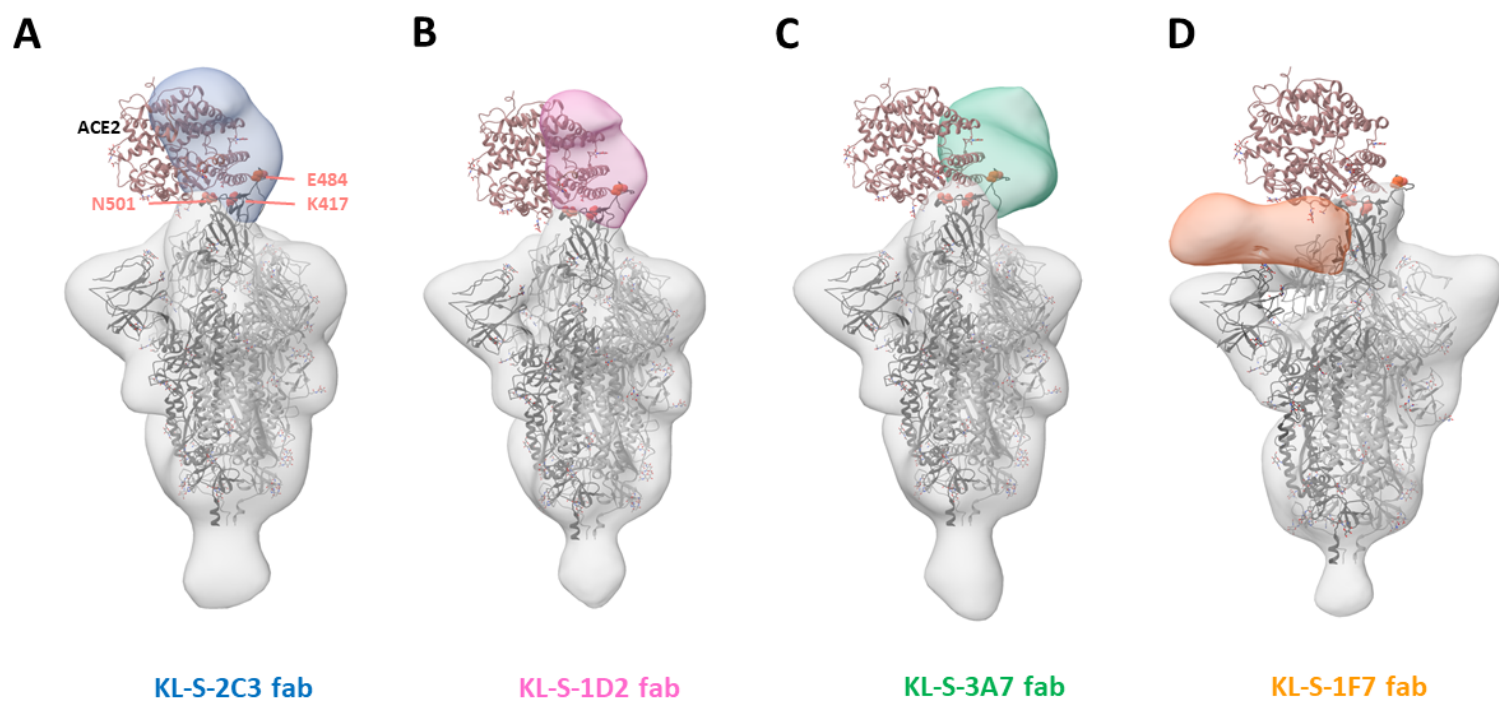

Source: https://www.biorxiv.org/content/10.1101/2021.04.05.438547v1.full.pdf
